# Supplementary material
Source: PubMed Central journal article supplement (PMC3176515)

## Supplementary Tables and Figures

Table S1. Statistics of clone libraries.

The clone library sequences for ABP and DBP were compared in the RDP database (<http://rdp.cme.msu.edu/comparison/>). The confidence level employed in the classification was 80%. The table shows the number of clone sequences assigned to different taxonomic levels and the statistical significance of the comparisons.

| Rank     | Name                | ABP | DBP | Significance |
|----------|---------------------|-----|-----|--------------|
| phylum   | Deinococcus-Thermus | 0   | 29  | 2.11E-09     |
| class    | Deinococci          | 0   | 29  | 2.11E-09     |
| genus    | Meiothermus         | 0   | 29  | 2.11E-09     |
| family   | Thermaceae          | 0   | 29  | 2.11E-09     |
| order    | Thermales           | 0   | 29  | 2.11E-09     |
| class    | Betaproteobacteria  | 97  | 69  | 6.34E-05     |
| family   | Burkholderiaceae    | 96  | 68  | 6.34E-05     |
| order    | Burkholderiales     | 97  | 69  | 6.34E-05     |
| phylum   | Proteobacteria      | 107 | 84  | 1.00E-04     |
| family   | Microbacteriaceae   | 9   | 0   | 1.87E-03     |
| genus    | Microbacterium      | 9   | 0   | 1.87E-03     |
| suborder | Micrococcineae      | 9   | 0   | 1.87E-03     |
| genus    | Cupriavidus         | 80  | 58  | 2.98E-03     |
| phylum   | Actinobacteria      | 9   | 1   | 1.13E-02     |
| class    | Actinobacteria      | 9   | 1   | 1.13E-02     |
| subclass | Actinobacteridae    | 9   | 1   | 1.13E-02     |
| order    | Actinomycetales     | 9   | 1   | 1.13E-02     |
| genus    | Ralstonia           | 15  | 5   | 2.53E-02     |
| class    | Bacilli             | 0   | 4   | 6.38E-02     |
| phylum   | Firmicutes          | 0   | 4   | 6.38E-02     |
| family   | Bacillaceae         | 0   | 4   | 6.38E-02     |
| order    | Bacillales          | 0   | 4   | 6.38E-02     |
| genus    | Brevundimonas       | 0   | 4   | 6.38E-02     |
| family   | Caulobacteraceae    | 0   | 4   | 6.38E-02     |
| order    | Caulobacterales     | 0   | 4   | 6.38E-02     |
| genus    | Acinetobacter       | 5   | 1   | 1.22E-01     |
| family   | Moraxellaceae       | 5   | 1   | 1.22E-01     |
| order    | Pseudomonadales     | 5   | 1   | 1.22E-01     |
| order    | Sphingomonadales    | 0   | 3   | 1.27E-01     |
| genus    | Wautersia           | 0   | 3   | 1.27E-01     |
| class    | Alphaproteobacteria | 5   | 11  | 1.48E-01     |
| genus    | Bacillus            | 0   | 2   | 2.53E-01     |
| family   | Sphingomonadaceae   | 0   | 2   | 2.53E-01     |
| genus    | Sphingopyxis        | 0   | 2   | 2.53E-01     |
| genus    | Stenotrophomonas    | 0   | 2   | 2.53E-01     |

|          |                                 |     |     |          |
|----------|---------------------------------|-----|-----|----------|
| family   | Xanthomonadaceae                | 0   | 2   | 2.53E-01 |
| order    | Xanthomonadales                 | 0   | 2   | 2.53E-01 |
| genus    | Achromobacter                   | 1   | 0   | 4.96E-01 |
| family   | Alcaligenaceae                  | 1   | 0   | 4.96E-01 |
| family   | Bradyrhizobiaceae               | 1   | 0   | 4.96E-01 |
| family   | Methylobacteriaceae             | 1   | 0   | 4.96E-01 |
| genus    | Methylobacterium                | 1   | 0   | 4.96E-01 |
|          | unclassified Bacteria           | 1   | 0   | NA       |
|          | unclassified Bradyrhizobiaceae  | 1   | 0   | NA       |
| class    | Gammaproteobacteria             | 5   | 3   | 5.00E-01 |
| genus    | Anoxybacillus                   | 0   | 1   | 5.04E-01 |
| family   | Erythrobacteraceae              | 0   | 1   | 5.04E-01 |
| family   | Nocardiodaceae                  | 0   | 1   | 5.04E-01 |
| suborder | Propionibacterineae             | 0   | 1   | 5.04E-01 |
|          | unclassified Proteobacteria     | 0   | 1   | NA       |
|          | unclassified Bacillaceae        | 0   | 1   | NA       |
|          | unclassified Burkholderiales    | 0   | 1   | NA       |
|          | unclassified Erythrobacteraceae | 0   | 1   | NA       |
|          | unclassified Nocardiodaceae     | 0   | 1   | NA       |
|          | unclassified Burkholderiaceae   | 1   | 2   | NA       |
| family   | Phyllobacteriaceae              | 3   | 4   | 7.36E-01 |
| genus    | Phyllobacterium                 | 3   | 4   | 7.36E-01 |
| order    | Rhizobiales                     | 5   | 4   | 7.44E-01 |
|          | unclassified Root               | 1   | 1   | NA       |
| norank   | Root                            | 118 | 119 | 1.00E+00 |
| domain   | Bacteria                        | 117 | 118 | 1.00E+00 |

Table S2. Chemical compounds detected in the brine water from the Atlantis II Deep brine pool identified from the brine water sample by GC-MS analysis. Rt refers to the retention time of a compound in the chromatogram, ‘% R’ refers to the area of each peak with reference to the largest peak in the chromatogram, and ‘% P’ is the probability of the identification. Aromatic compounds with a %P of >25% are shown in bold. The compounds were predicted based on the NIST database (<http://srdata.nist.gov/>).

| Rt                                               | NIST match                                                                                       | % P  | % R   |
|--------------------------------------------------|--------------------------------------------------------------------------------------------------|------|-------|
| Compounds in the DCM fraction                    |                                                                                                  |      |       |
| 9.864                                            | Decanal dimethyl acetal                                                                          | 38.6 | 15.01 |
| 10.744                                           | <b>Benzoic acid, ethoxy ethyl ester</b>                                                          | 38.5 | 11.97 |
| 11.485                                           | 8- methyl- 9- tetradecanoic acid                                                                 | 11.2 | 16.22 |
| 11.626                                           | Tridecanoic acid                                                                                 | 13.8 | 6.45  |
| 11.928                                           | 8- methyl-9- tetracen-1-olacetate                                                                | 10.1 | 7.21  |
| 12.038                                           | 2- Bromo-tetra decanoic acid                                                                     | 13.5 | 6.05  |
| 12.47                                            | Pentadecanoic acid- 14- methyl- methyl ester                                                     | 39.3 | 25.25 |
| 14.526                                           | Thiocarbamic acid, N,N-dimethyl, S-1,3-diphenyl-2-butenyl ester                                  | 10.4 | 58.21 |
| 16.176                                           | <b>Phen-1,4-diol, 2,3-dimethyl-5-trifluoromethyl-</b>                                            | 30.4 | 6.0   |
| 17.354                                           | Tert-Hexadecanethiol                                                                             | 5.62 | 2.6   |
| 18.219                                           | 9,10-Secocholesta-5,7,10(19)-triene-3,24,25-triol, (3á,5Z,7E)-                                   | 18.2 | 0.37  |
| 20.54                                            | Oxiraneundecanoic acid, 3-pentyl-, methyl ester, cis-                                            | 10.7 | 0.63  |
| 20.931                                           | Hexadecanoic acid, methyl ester                                                                  | 67.8 | 6.14  |
| 21.22                                            | 1,2-Benzenedicarboxylic acid, butyl 2-ethylhexyl ester                                           | 16.9 | 27.82 |
| 24.315                                           | <b>2-(4-Iodo-phenyl)-5,6,7,8-tetrahydro-pyrazolo[5,1-b]quinazolin-9-ol</b>                       | 36.8 | 100   |
| Compounds in the methanol fraction (Derivatized) |                                                                                                  |      |       |
| 14.474                                           | Silanol, trimethyl-, phosphate (3:1)                                                             | 78.3 | 31.71 |
| 15.441                                           | 2-Dimethyl(trimethylsilyl)silyloxytridecane                                                      | 6.87 | 3.15  |
| 16.352                                           | Butanedioic acid, bis(trimethylsilyl) ester                                                      | 81.3 | 69.77 |
| 20.181                                           | Erythro-Pentonic acid, 2-deoxy-3,4,5-tris-O-(trimethylsilyl)-, trimethylsilyl ester              | 5.66 | 11.73 |
| 24.231                                           | Hexanedioic acid, bis(trimethylsilyl) ester                                                      | 89   | 6.26  |
| 28.09                                            | b-D-Galactopyranoside, methyl 2,3-bis-O-(trimethylsilyl)-, cyclic                                | 46.4 | 4.12  |
| 30.934                                           | <b>1,2-Benzenedicarboxylic acid, bis(trimethylsilyl) ester</b>                                   | 97.8 | 44.89 |
| 33.513                                           | <b>1,4-Benzenedicarboxylic acid, bis(trimethylsilyl) ester</b>                                   | 68.8 | 12.02 |
| 36.582                                           | a-D-Glucopyranoside, methyl 2-(acetylamino)-2-deoxy-3-O-(trimethylsilyl)-, cyclic methylboronate | 22.7 | 17.12 |
| 42.901                                           | Hexadecanoic acid, trimethylsilyl ester                                                          | 91.3 | 100   |
| 48.512                                           | 9,12,15-Octadecatrienoic acid, 2,3-bis[(trimethylsilyl)oxy]propyl ester, (Z,Z)                   | 21.7 | 54.74 |

Table S3. Bacteria detected by the 16S rDNA fragments from the metareads. The classification was conducted in the RDP database without using a confidence threshold. ABP: Atlantis II Deep brine pool; DBP: Discovery Deep brine pool.

| Phylum                | ABP | DBP |
|-----------------------|-----|-----|
| Proteobacteria        | 733 | 175 |
| Actinobacteria        | 49  | 11  |
| Firmicutes            | 4   | 12  |
| Chrysiogenetes        | 2   | 0   |
| Dictyoglomi           | 1   | 0   |
| Deinococcus-Thermus   | 0   | 26  |
| Cyanobacteria         | 0   | 1   |
| Bacteroidetes         | 0   | 3   |
| Thermotogae           | 0   | 2   |
| Thermodesulfobacteria | 0   | 1   |
| Euryarchaeota         | 0   | 208 |
| Crenarchaeota         | 3   | 14  |
| Total                 | 792 | 453 |

Table S4. Average confidence (%) of classification of 16S rDNA fragments .  
The 16S rDNA fragments were extracted from the metareads and classified into genera by the RDP classifier. The confidence values were obtained from the RDP database; the average and standard deviation (SD) are shown in this table.

| Genus                           | ABP         |        | DBP         |        |
|---------------------------------|-------------|--------|-------------|--------|
|                                 | Average (%) | SD (%) | Average (%) | SD (%) |
| Pro:Bet:Bur:Bur:Cupriavidus     | 90          | 15     | 93          | 15     |
| Pro:Gam:Pse:Mor:Acinetobacter   | 91          | 15     | 94          | 15     |
| Pro:Bet:Bur:Bur:Wautersia       | 56          | 14     | 54          | 20     |
| Pro:Bet:Bur:Bur:Ralstonia       | 91          | 19     | 99          | 1      |
| Act:Act:Mic:Mic:Microbacterium  | 96          | 10     | 93          | 12     |
| Pro:Alp:Rhi:Bra:Bradyrhizobium  | 93          | 14     | 100         | -      |
| Pro:Bet:Bur:Com:Rhodoferrax     | 45          | 22     | 65          | 27     |
| Pro:Bet:Bur:Com:Malikia         | 9           | 2      | 8           | 5      |
| Pro:Alp:Rhi:Phy:Phyllobacterium | 97          | 4      | -           | -      |
| Pro:Gam:Pse:Mor:Alkanindiges    | 64          | 13     | 39          | -      |
| Pro:Alp:Rhi:Bra:Afipia          | 66          | 19     | -           | -      |
| Fir:Bac:Bac:Bac:Bac:Bacillus    | 53          | 32     | -           | -      |

Table S5. KEGG maps for the Atlantis II Deep brine pool-specific abundant KEGG genes.

The ABP genes in the red part of Fig. 3 were sorted into different KEGG pathways. The number of the nodes means how many genes were identified in a KEGG pathway map.

| Map    | Node num | Pathway                                     |
|--------|----------|---------------------------------------------|
| K02020 | 35       | Two-component system                        |
| K02010 | 24       | ABC transporters                            |
| K00350 | 13       | Tyrosine metabolism                         |
| K03070 | 13       | Bacterial secretion system                  |
| K00650 | 12       | Butanoate metabolism                        |
| K00362 | 12       | Benzoate degradation via hydroxylation      |
| K00360 | 11       | Phenylalanine metabolism                    |
| K00632 | 11       | Benzoate degradation via CoA ligation       |
| K00361 | 10       | Gamma-hexachlorocyclohexane degradation     |
| K00903 | 10       | Limonene and pinene degradation             |
| K00071 | 9        | Fatty acid metabolism                       |
| K00910 | 9        | Nitrogen metabolism                         |
| K00330 | 9        | Arginine and proline metabolism             |
| K00280 | 8        | Valine, leucine, and isoleucine degradation |
| K02030 | 8        | Bacterial chemotaxis – general              |
| K00380 | 7        | Tryptophan metabolism                       |
| K00643 | 7        | Styrene degradation                         |
| K00930 | 6        | Caprolactam degradation                     |
| K00620 | 6        | Pyruvate metabolism                         |
| K02040 | 6        | Flagellar assembly                          |
| K00230 | 5        | Purine metabolism                           |
| K00271 | 5        | Methionine metabolism                       |
| K00630 | 5        | Glyoxylate and dicarboxylate metabolism     |
| K00053 | 5        | Ascorbate and aldarate metabolism           |
| K00260 | 5        | Glycine, serine, and threonine metabolism   |
| K00340 | 5        | Histidine metabolism                        |
| K00190 | 5        | Oxidative phosphorylation                   |
| K00920 | 4        | Sulfur metabolism                           |
| K00623 | 4        | 2,4-Dichlorobenzoate degradation            |
| K00480 | 4        | Glutathione metabolism                      |
| K00564 | 4        | Glycerophospholipid metabolism              |

Table S6. KEGG maps for DBP-specific abundant KEGG genes.  
 The DBP genes in the red part of Fig. 3 were sorted into different KEGG pathways. The number of the nodes means how many genes were identified in a KEGG pathway map.

| Map    | Node num | Pathway                         |
|--------|----------|---------------------------------|
| K00240 | 13       | Pyrimidine metabolism           |
| K00230 | 12       | Purine metabolism               |
| K00790 | 10       | Folate biosynthesis             |
| K03010 | 7        | Ribosome                        |
| K02010 | 6        | ABC transporters                |
| K00970 | 6        | Aminoacyl-tRNA biosynthesis     |
| K00330 | 5        | Arginine and proline metabolism |
| K00190 | 4        | Oxidative phosphorylation       |
| K03410 | 4        | Base excision repair            |
| K03420 | 4        | Nucleotide excision repair      |

Figure S1. Bacterial classification of the 16S rRNA clone sequences. A total of 117 and 119 clone sequences were obtained for the Atlantis II Deep (ABP) and Discovery Deep (DBP) brine pool, respectively. The classification was performed with the RDP classifier (Cole et al., 2009). The minor groups include genera accounting for less than 1% of the total.

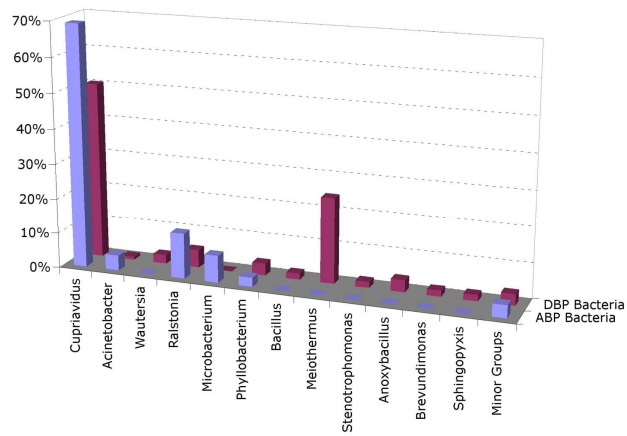



Figure S2. GC-MS results for detections of aromatic compounds and fatty acids

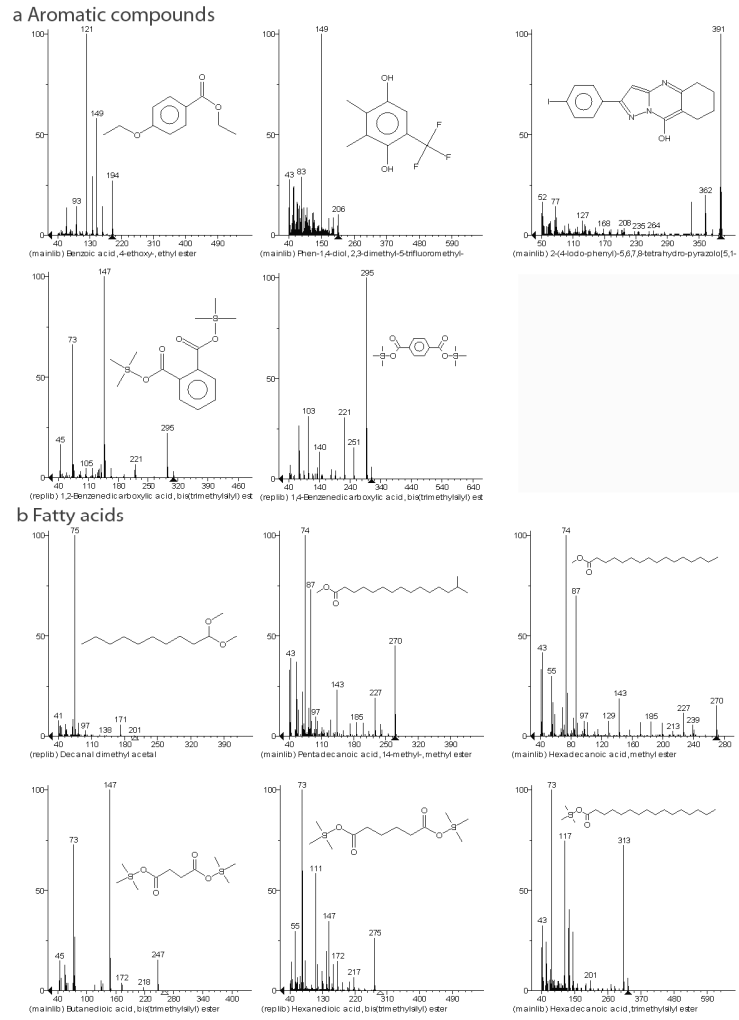

Supplement: ismej201142x1.pdf [file ismej201142x1.pdf]
